# Supplementary material
Source: ML conference proceedings conference paper supplement (https://proceedings.neurips.cc/paper_files/paper/2022/hash/217a2a387f52c30755c37b0a73430291-Abstract.html)
Supplement: Supplementary file 1 [file 217a2a387f52c30755c37b0a73430291-Supplemental-Datasets_and_Benchmarks.zip]

Archive with 2 entries (2 files):
- sub_ma_revision5.pdf
- sup_ma_video.mp4
